# Supplementary material for: Structure, Function, and Applications of Soybean Calcium Transporters
Source: Int J Mol Sci. 2022 Nov 17;23(22):14220. doi: 10.3390/ijms232214220 (PMC9693241; doi:10.3390/ijms232214220)
Supplement: Supplementary file 1 [file ijms-23-14220-s001.zip › Supplemental Table S1. A list of eight published gene families encoding Ca2+ transporters in the soybean genome.xlsx]

## Sheet: Sheet1
Supplementary Table S1. A list of eight published gene families encoding Ca2+ transporters in the soybean genome
No.	Gene name	Gene family	Wm82.a1.v1	Wm82.a1.v1.1	Wm82.a2.v1	Wm82.a4.v1
1	GmACA1	Ca2+-ATPase	Glyma01g40130	Glyma01g40130	Glyma.01g193600	Glyma.01g193600
2	GmACA2	Ca2+-ATPase	Glyma02g32780	Glyma02g32780	Glyma.02g186100	Glyma.02g186100
3	GmACA3	Ca2+-ATPase	Glyma03g29010	Glyma03g29010	Glyma.03g134200	Glyma.03g134200
4	GmACA4	Ca2+-ATPase	Glyma03g31420	Glyma03g31420	no correspondence	no correspondence
5	GmACA5	Ca2+-ATPase	Glyma04g04810	Glyma04g04810	Glyma.04g045400	Glyma.04g045400
6	GmACA6	Ca2+-ATPase	Glyma05g22420	Glyma05g22420	Glyma.05g105200	Glyma.05g105200
7	GmACA7	Ca2+-ATPase	Glyma06g04900	Glyma06g04900	Glyma.06g046000	Glyma.06g046000
8	GmACA8	Ca2+-ATPase	Glyma07g00630	Glyma07g00630	Glyma.07g004300	Glyma.07g004300
9	GmACA9	Ca2+-ATPase	Glyma08g04980	Glyma08g04980	Glyma.08g045000	Glyma.08g045000
10	GmACA10	Ca2+-ATPase	Glyma08g23760	Glyma08g23760	Glyma.08g222200	Glyma.08g222200
11	GmACA11	Ca2+-ATPase	Glyma09g06880/Glyma09g06890	Glyma09g06890	Glyma.09g061200	Glyma.09g061200
12	GmACA12	Ca2+-ATPase	Glyma09g35970	Glyma09g35970	Glyma.09g225500	Glyma.09g225500
13	GmACA13	Ca2+-ATPase	Glyma10g15800	Glyma10g15800	Glyma.10g107700	Glyma.10g107700
14	GmACA14	Ca2+-ATPase	Glyma11g05190	Glyma11g05190	Glyma.11g048300	Glyma.11g048300
15	GmACA15	Ca2+-ATPase	Glyma11g10830	Glyma11g10830	Glyma.11g101900	Glyma.11g101900
16	GmACA16	Ca2+-ATPase	Glyma12g01360	Glyma12g01360	Glyma.12g011000	Glyma.12g011000
17	GmACA17	Ca2+-ATPase	Glyma13g00420	Glyma13g00416	Glyma.13g101700	Glyma.13g101700
18	GmACA18	Ca2+-ATPase	Glyma13g44990	Glyma13g44990	Glyma.13g372400	Glyma.13g372400
19	GmACA19	Ca2+-ATPase	Glyma15g00340	Glyma15g00340	Glyma.15g001300	Glyma.15g001300
20	GmACA20	Ca2+-ATPase	Glyma17g06520/Glyma17g06530	Glyma17g06520	Glyma.17g057800	Glyma.17g057800
21	GmACA21	Ca2+-ATPase	Glyma17g17450	Glyma17g17450	Glyma.17g161300	Glyma.17g161300
22	GmACA22	Ca2+-ATPase	Glyma19g05140	Glyma19g05140	Glyma.19g038600	Glyma.19g038600
23	GmACA23	Ca2+-ATPase	Glyma19g31770/Glyma19g31790	Glyma19g31771	Glyma.19g136400	Glyma.19g136400
24	GmACA24	Ca2+-ATPase	Glyma19g34250	Glyma19g34250	Glyma.19g159900	Glyma.19g159900
25	GmACA25	Ca2+-ATPase	no correspondence	no correspondence	Glyma.03g157700	Glyma.03g157700
26	GmACA26	Ca2+-ATPase	Glyma14g01140	Glyma14g01140	Glyma.14g008100	Glyma.14g008100
27	GmACA27	Ca2+-ATPase	no correspondence	no correspondence	Glyma.15g167500	Glyma.15g167500
28	GmECA1	Ca2+-ATPase	Glyma03g33240	Glyma03g33240	Glyma.03g175200	Glyma.03g175200
29	GmECA2	Ca2+-ATPase	Glyma04g04920	Glyma04g04920	Glyma.04g046700	Glyma.04g046700
30	GmECA3	Ca2+-ATPase	Glyma07g05890	Glyma07g05890	Glyma.07g053100	Glyma.07g053100
31	GmECA4	Ca2+-ATPase	Glyma16g02490	Glyma16g02490	Glyma.16g022200	Glyma.16g022200
32	GmECA5	Ca2+-ATPase	Glyma19g35960	Glyma19g35960	Glyma.19g175900	Glyma.19g175900
33	GmCAX1	CaCA	Glyma01g30610	Glyma01g30610	Glyma.01g122800	Glyma.01g122800
34	GmCAX2	CaCA	Glyma02g39150	Glyma02g39150	Glyma.02g226500	Glyma.02g226500
35	GmCAX3	CaCA	Glyma03g07910	Glyma03g07910	Glyma.03g058300	Glyma.03g058300
36	GmCAX4	CaCA	Glyma03g07950	Glyma03g07950	Glyma.03g058500	Glyma.03g058500
37	GmCAX5	CaCA	Glyma07g18150	Glyma07g18150	Glyma.07g149600	Glyma.07g149600
38	GmCAX6	CaCA	Glyma08g44910	Glyma08g44910	Glyma.08g337000	Glyma.08g337000
39	GmCAX7	CaCA	Glyma08g44920	Glyma08g44921	Glyma.08g336900	Glyma.08g336900
40	GmCAX8	CaCA	Glyma11g25250	Glyma11g25250	no correspondence	no correspondence
41	GmCAX9	CaCA	Glyma13g44960	Glyma13g44960	Glyma.13g372100	Glyma.13g372100
42	GmCAX10	CaCA	Glyma14g37250	Glyma14g37250	Glyma.14g193400	Glyma.14g193400
43	GmCAX11	CaCA	Glyma15g00380	Glyma15g00380	Glyma.15g001600	Glyma.15g001600
44	GmCAX12	CaCA	Glyma18g07060	Glyma18g07060	Glyma.18g063200	Glyma.18g063200
45	GmCAX13	CaCA	Glyma18g08030	Glyma18g08030	Glyma.18g072200	Glyma.18g072200
46	GmCAX14	CaCA	Glyma18g43000	Glyma18g43000	Glyma.18g200500	Glyma.18g200500
47	GmCCX1	CaCA	Glyma03g39920	Glyma03g39920	Glyma.03g239500	Glyma.03g239500
48	GmCCX2	CaCA	Glyma06g16100	Glyma06g16100	Glyma.06g155200	Glyma.06g155200
49	GmCCX3	CaCA	Glyma07g04510/Glyma07g04520	Glyma07g04515	Glyma.07g040300	Glyma.07g040300
50	GmCCX5	CaCA	Glyma16g04020	Glyma16g04020	Glyma.16g036000	Glyma.16g036000
51	GmCCX6	CaCA	Glyma19g17230	Glyma19g17230	Glyma.19g066700	Glyma.19g066700
52	GmCCX7	CaCA	Glyma19g29520	Glyma19g29520	Glyma.19g117100	Glyma.19g117100
53	GmCCX8	CaCA	Glyma19g29530	Glyma19g29530	Glyma.19g117200	Glyma.19g117200
54	GmEFCAX1/NCL1	CaCA	Glyma12g35690	Glyma12g35690	Glyma.12g228000	no correspondence
55	GmEFCAX2/NCL2	CaCA	Glyma13g34720	Glyma13g34720	Glyma.13g272000	Glyma.13g272000
56	GmEFCAX3/NCL3	CaCA	Glyma12g35670	Glyma12g35670	Glyma.12g227800	Glyma.12g227800
57	GmEFCAX4/NCL4	CaCA	Glyma13g34750	Glyma13g34750	Glyma.13g272300	Glyma.13g272300
58	GmMHX	CaCA	Glyma10g02250	Glyma10g02250	Glyma.10g018000	Glyma.10g018000
59	GmCNGC1	CNGC	Glyma03g41780	Glyma03g41780	Glyma.03g257000	Glyma.03g257000
60	GmCNGC2	CNGC	Glyma19g44430	Glyma19g44430	Glyma.19g255300	Glyma.19g255300
61	GmCNGC3	CNGC	Glyma19g44450	Glyma19g44451	Glyma.19g255500	Glyma.19g255500
62	GmCNGC4	CNGC	Glyma03g41790	Glyma03g41790	Glyma.03g257100	no correspondence
63	GmCNGC5	CNGC	Glyma07g06220	Glyma07g06220	Glyma.07g056400	Glyma.07g056400
64	GmCNGC6	CNGC	Glyma16g02850	Glyma16g02853	Glyma.16g025400	Glyma.16g025400
65	GmCNGC7	CNGC	Glyma14g31940	Glyma14g31940	Glyma.14g161600	Glyma.14g161600
66	GmCNGC8	CNGC	Glyma04g41610	Glyma04g41610	Glyma.04g237400	Glyma.04g237400
67	GmCNGC9	CNGC	Glyma06g13200	Glyma06g13200	Glyma.06g126600	Glyma.06g126600
68	GmCNGC10	CNGC	Glyma07g02560	Glyma07g02560	Glyma.07g022500	Glyma.07g022500
69	GmCNGC11	CNGC	Glyma08g23460	Glyma08g23460	Glyma.08g219300	Glyma.08g219300
70	GmCNGC12	CNGC	Glyma12g23890	Glyma12g23890	Glyma.12g152300	Glyma.12g152300
71	GmCNGC13	CNGC	Glyma02g36560	Glyma02g36560	Glyma.02g204300	Glyma.02g204300
72	GmCNGC14	CNGC	Glyma17g08120	Glyma17g08120	Glyma.17g073500	Glyma.17g073500
73	GmCNGC15	CNGC	Glyma12g29840	Glyma12g29840	Glyma.12g175000	Glyma.12g175000
74	GmCNGC16	CNGC	Glyma13g39960	Glyma13g39965	Glyma.13g324600	Glyma.13g324600
75	GmCNGC17	CNGC	Glyma12g08160	Glyma12g08160	Glyma.12g076800	Glyma.12g076800
76	GmCNGC18	CNGC	Glyma10g06120	Glyma10g06121	Glyma.10g053900	Glyma.10g053900
77	GmCNGC19	CNGC	Glyma13g20420	Glyma13g20420	Glyma.13g141000	Glyma.13g141000
78	GmCNGC20	CNGC	Glyma04g35210	Glyma04g35210	Glyma.04g181000	Glyma.04g181000
79	GmCNGC21	CNGC	Glyma06g19570	Glyma06g19570	Glyma.06g184000	Glyma.06g184000
80	GmCNGC22	CNGC	Glyma06g08110	Glyma06g08110	Glyma.06g077300	Glyma.06g077300
81	GmCNGC23	CNGC	no correspondence	Glyma04g08085	Glyma.04g076400	no correspondence
82	GmCNGC24	CNGC	Glyma06g08170	Glyma06g08170	Glyma.06g077600	Glyma.06g077600
83	GmCNGC25	CNGC	Glyma04g24950	Glyma04g24950	Glyma.04g157200	Glyma.04g157200
84	GmCNGC26	CNGC	Glyma06g30030	Glyma06g30030	Glyma.06g223800	Glyma.06g223800
85	GmCNGC27	CNGC	Glyma06g42310	Glyma06g42310	Glyma.06g271200	Glyma.06g271200
86	GmCNGC28	CNGC	Glyma12g16160	Glyma12g16146	Glyma.12g133700	Glyma.12g133700
87	GmCNGC29	CNGC	Glyma12g34740	Glyma12g34740	Glyma.12g219000	Glyma.12g219000
88	GmCNGC30	CNGC	Glyma08g26340	Glyma08g26340	Glyma.08g241600	Glyma.08g241600
89	GmCNGC31	CNGC	Glyma18g49890	Glyma18g49890	Glyma.18g263900	Glyma.18g263900
90	GmCNGC32	CNGC	Glyma09g29880	Glyma09g29880	Glyma.09g168700	Glyma.09g168700
91	GmCNGC33	CNGC	Glyma16g34420	Glyma16g34420	Glyma.16g218300	Glyma.16g218300
92	GmCNGC34	CNGC	Glyma16g34380	Glyma16g34381	Glyma.16g218100	Glyma.16g218100
93	GmCNGC35	CNGC	Glyma09g29850	Glyma09g29850	Glyma.09g168400	Glyma.09g168400
94	GmCNGC36	CNGC	Glyma09g29860	Glyma09g29860	Glyma.09g168500	Glyma.09g168500
95	GmCNGC37	CNGC	Glyma16g34370	Glyma16g34370	Glyma.16g218000	Glyma.16g218000
96	GmCNGC38	CNGC	Glyma09g29870	Glyma09g29870	Glyma.09g168600	Glyma.09g168600
97	GmCNGC39	CNGC	Glyma16g34390	Glyma16g34390	Glyma.16g218200	Glyma.16g218200
98	GmTPC1	TPC	no correspondence	Glyma12g33165	Glyma.12g204400	Glyma.12g204400
99	GmTPC2	TPC	Glyma13g37280	Glyma13g37280	Glyma.13g296900	Glyma.13g296900
100	GmGLR1.1	GLR	Glyma13g01330	Glyma13g01330	Glyma.13g093300	no correspondence
101	GmGLR1.2	GLR	Glyma17g07470	Glyma17g07470	Glyma.17g067200	Glyma.17g067200
102	GmGLR1.3	GLR	Glyma07g35290	Glyma07g35290	Glyma.07g226400	Glyma.07g226400
103	GmGLR1.4	GLR	Glyma07g35300	Glyma07g35300	Glyma.07g226500	Glyma.07g226500
104	GmGLR3.1	GLR	Glyma01g36210	Glyma01g36210	Glyma.01g157900	Glyma.01g157900
105	GmGLR3.2	GLR	Glyma11g09230	Glyma11g09230	Glyma.11g087100	Glyma.11g087100
106	GmGLR3.3	GLR	Glyma09g32980	Glyma09g32980	Glyma.09g197100	Glyma.09g197100
107	GmGLR3.4	GLR	Glyma16g21470	Glyma16g21470	Glyma.16g111700	Glyma.16g111700
108	GmGLR3.5	GLR	Glyma09g32990	Glyma09g32990	Glyma.09g197200	Glyma.09g197200
109	GmGLR3.6	GLR	Glyma09g33010	Glyma09g33010	Glyma.09g197400	Glyma.09g197400
110	GmGLR3.7	GLR	Glyma04g01760	Glyma04g01760	Glyma.04g016000	Glyma.04g016000
111	GmGLR3.8	GLR	Glyma06g01860	Glyma06g01860	Glyma.06g016000	Glyma.06g016000
112	GmGLR3.9	GLR	Glyma02g48130	Glyma02g48130	Glyma.02g311500	no correspondence
113	GmGLR3.10	GLR	Glyma14g00350	Glyma14g00350	Glyma.14g001100	Glyma.14g001100
114	GmGLR3.11	GLR	Glyma06g46130	Glyma06g46130	Glyma.06g305000	Glyma.06g305000
115	GmGLR3.12	GLR	Glyma12g10650	Glyma12g10650	Glyma.12g099500	Glyma.12g099500
116	GmGLR3.13	GLR	Glyma12g32030	Glyma12g32030	Glyma.12g194200	Glyma.12g194200
117	GmGLR3.14	GLR	Glyma13g38450	Glyma13g38450	Glyma.13g308400	Glyma.13g308400
118	GmGLR3.15	GLR	Glyma12g32020	Glyma12g32020	Glyma.12g194100	Glyma.12g194100
119	GmGLR3.16	GLR	Glyma13g38460	Glyma13g38460	Glyma.13g308500	Glyma.13g308500
120	GmGLR4.1	GLR	no correspondence	no correspondence	Glyma.06g233700	no correspondence
121	GmGLR4.2	GLR	no correspondence	no correspondence	Glyma.06g234000	Glyma.06g234000
122	GmGLR4.3	GLR	Glyma06g34880	Glyma06g34880	Glyma.06g233600	Glyma.06g233600
123	GmGLR4.4	GLR	Glyma06g34900	Glyma06g34900	Glyma.06g233900	Glyma.06g233900
124	GmGLR4.5	GLR	Glyma13g34760	Glyma13g34760	Glyma.13g272400	Glyma.13g272400
125	GmGLR4.6	GLR	Glyma07g32490	Glyma07g32490	Glyma.07g203700	Glyma.07g203700
126	GmGLR4.7	GLR	Glyma13g24080	Glyma13g24080	Glyma.13g172100	Glyma.13g172100
127	GmGLR4.8	GLR	Glyma13g30660	Glyma13g30660	Glyma.13g233400	Glyma.13g233400
128	GmGLR4.9	GLR	Glyma13g30620	Glyma13g30620	Glyma.13g233000	Glyma.13g233000
129	GmGLR4.10	GLR	Glyma13g30650	Glyma13g30650	Glyma.13g233300	Glyma.13g233300
130	GmGLR4.11	GLR	Glyma14g09140	Glyma14g09140	Glyma.14g083200	Glyma.14g083200
131	GmGLR4.12	GLR	Glyma17g36040	Glyma17g36041	Glyma.17g241900	no correspondence
132	GmGLR4.13	GLR	Glyma16g06660	Glyma16g06660	Glyma.16g061600	Glyma.16g061600
133	GmGLR4.14	GLR	Glyma16g06670	Glyma16g06670	Glyma.16g061700	no correspondence
134	GmGLR4.15	GLR	Glyma16g06680	Glyma16g06681	Glyma.16g061800	Glyma.16g061800
135	GmOSCA1.1	OSCA	Glyma07g39320	Glyma07g39320	Glyma.07g263300	Glyma.07g263300
136	GmOSCA1.2	OSCA	Glyma17g01400	Glyma17g01400	Glyma.17g010500	Glyma.17g010500
137	GmOSCA1.3	OSCA	Glyma13g10490	Glyma13g10490	Glyma.13g002200	Glyma.13g002200
138	GmOSCA1.4	OSCA	Glyma20g16230	Glyma20g16230	Glyma.20g066800	Glyma.20g066800
139	GmOSCA1.5	OSCA	Glyma02g43910	Glyma02g43910	Glyma.02g271300	Glyma.02g271300
140	GmOSCA1.6	OSCA	Glyma03g30780	Glyma03g30780	Glyma.03g151300	Glyma.03g151300
141	GmOSCA1.7	OSCA	Glyma19g33630	Glyma19g33630	Glyma.19g153800	Glyma.19g153800
142	GmOSCA1.8	OSCA	Glyma01g01360	Glyma01g01360	Glyma.01g010100	Glyma.01g010100
143	GmOSCA1.9	OSCA	Glyma09g34420	Glyma09g34420	Glyma.09g211000	Glyma.09g211000
144	GmOSCA2.1	OSCA	Glyma11g21310	Glyma11g21310	Glyma.11g152700	Glyma.11g152700
145	GmOSCA2.2	OSCA	Glyma18g49750	Glyma18g49750	Glyma.18g262600	Glyma.18g262600
146	GmOSCA2.3	OSCA	Glyma19g03100/Glyma19g03110	Glyma19g03105	Glyma.19g025900	Glyma.19g025900
147	GmOSCA2.4	OSCA	no correspondence	no correspondence	Glyma.01g052900	Glyma.01g052900
148	GmOSCA2.5	OSCA	Glyma02g12400	Glyma02g12400	Glyma.02g111500	Glyma.02g111500
149	GmOSCA2.6	OSCA	Glyma04g05160	Glyma04g05160	Glyma.04g048800	Glyma.04g048800
150	GmOSCA2.7	OSCA	Glyma14g10320	Glyma14g10320	Glyma.14g090700	Glyma.14g090700
151	GmOSCA2.8	OSCA	Glyma0041s00290	Glyma0041s00290 Glyma.U038600	Glyma0041s00290 Glyma.U038600	Glyma.17g232235
152	GmOSCA3.1	OSCA	Glyma13g29270	Glyma13g29270	Glyma.13g220900	Glyma.13g220900
153	GmOSCA3.2	OSCA	Glyma15g09820	Glyma15g09820	Glyma.15g091600	Glyma.15g091600
154	GmOSCA4.1	OSCA	Glyma02g05040	Glyma02g05036	Glyma.02g044800	Glyma.02g044800
155	GmOSCA4.2	OSCA	Glyma16g23100	Glyma16g23100	Glyma.16g122300	Glyma.16g122300
156	GmMCA1	MCA	Glyma01g36860	Glyma01g36860	Glyma.01g164000	Glyma.01g164000
157	GmMCA2	MCA	Glyma11g08430	Glyma11g08430	Glyma.11g079500	Glyma.11g079500
158	GmMCA3	MCA	Glyma02g05130	Glyma02g05130	Glyma.02g045800	Glyma.02g045800
159	GmMCA4	MCA	Glyma16g23240	Glyma16g23240	Glyma.16g123800	Glyma.16g123800
160	GmMCA5	MCA	Glyma02g43090	Glyma02g43090	Glyma.02g263300	Glyma.02g263300
161	GmANN1	ANN	Glyma04g27100	Glyma04g27100	Glyma.04g140900	Glyma.04g140900
162	GmANN2	ANN	no correspondence	no correspondence	Glyma.11g153600	no correspondence
163	GmANN3	ANN	Glyma13g27000	Glyma13g27000	Glyma.13g199900	no correspondence
164	GmANN4	ANN	Glyma15g38050	Glyma15g38051	Glyma.15g238300	Glyma.15g238300
165	GmANN5	ANN	Glyma11g21480	Glyma11g21480	Glyma.11g153800	Glyma.11g153800
166	GmANN6	ANN	Glyma13g26960	Glyma13g26960	Glyma.13g199500	Glyma.13g199500
167	GmANN7	ANN	Glyma15g38010	Glyma15g38010	Glyma.15g237800	Glyma.15g237800
168	GmANN8	ANN	Glyma13g26990	Glyma13g26990	Glyma.13g199800	Glyma.13g199800
169	GmANN9	ANN	Glyma15g38040	Glyma15g38040	Glyma.15g238200	Glyma.u031126
170	GmANN10	ANN	Glyma09g03430	Glyma09g03430	Glyma.09g029600	Glyma.09g029600
171	GmANN11	ANN	Glyma15g14350	Glyma15g14350	Glyma.15g135400	Glyma.15g135400
172	GmANN12	ANN	no correspondence	no correspondence	Glyma.06g206100	no correspondence
173	GmANN13	ANN	Glyma13g01870	Glyma13g01870	Glyma.13g088700	Glyma.13g088700
174	GmANN14	ANN	Glyma05g31250	Glyma05g31250	Glyma.05g178700	Glyma.05g178700
175	GmANN15	ANN	Glyma08g14460	Glyma08g14460	Glyma.08g136200	Glyma.08g136200
176	GmANN16	ANN	Glyma13g27020	Glyma13g27020	Glyma.13g200100	Glyma.13g200100
177	GmANN17	ANN	Glyma15g38070	Glyma15g38070	Glyma.15g238500	Glyma.15g238500
178	GmANN18	ANN	Glyma13g27010	Glyma13g27010	Glyma.13g200000	Glyma.13g200000
179	GmANN19	ANN	Glyma15g38060	Glyma15g38060	Glyma.15g238400	Glyma.15g238400
180	GmANN20	ANN	no correspondence	no correspondence	Glyma.07g175400	Glyma.07g175400
181	GmANN21	ANN	Glyma20g01460	Glyma20g01460	Glyma.20g011800	Glyma.20g011800
182	GmANN22	ANN	Glyma05g33620	Glyma05g33620	Glyma.05g248000	Glyma.05g248000
183	GmANN23	ANN	Glyma08g06100	Glyma08g06100	Glyma.08g056500	Glyma.08g056500
184	GmANN24	ANN	Glyma07g12030	Glyma07g12030	Glyma.07g106600	Glyma.07g106600
185	GmANN25	ANN	Glyma09g30190	Glyma09g30190	Glyma.09g171600	Glyma.09g171600
186	GmANN26	ANN	Glyma13g26040	Glyma13g26040	Glyma.13g191200	Glyma.13g191200
